# Supplementary material for: Synthesis and properties of a stable, cationic, rhodium Lewis-acid catalyst for hydrosilation, Mukaiyama aldol and cyclopropanation reactions
Source: Royal Society of Chemistry journal article supplement (doi:10.1039/b007815h), 2001-01-01
Supplement: b007815h.doc [file b007815h.doc]

# Supporting Information

# Experimental Section

All solvents used were dried according to the Grubbs/Dow procedure,[[1]](#endnote-2) and all manipulations were done in either a drybox, or under argon atmosphere utilizing standard Schlenk and cannula technique, unless otherwise stated. NMR samples were prepared under inert atmosphere, utilizing CD2Cl2 that was dried over CaH2 and vacuum transferred before use. NMR spectra were recorded on a Bruker 400 MHz spectromoter at room temperature, unless otherwise noted. Complex **2** was synthesized according to a literature procedure.5,[[2]](#endnote-3) Triethylsilane was distilled and stored under inert atmosphere. Acetophenone and benzaldehyde were passed through a short plug of alumina to remove impurities prior to use. 1-hexene and 1-octene were purified by distillation from sodium metal. 1-trimethylsilyloxy-1-phenyl ethylene was purchased from Aldrich and used without further purification. NaB(Ar’)4 was purchased from Boulder Scientific and used without further purification, however better results were obtained after heating the solid to 120°C under vacuum overnight to remove any volatiles. Elemental analyses were done by Atlantic Microlabs.

Crystallographic data were collected at –100°C on a Bruker SMART 1K diffractometer using MoK radiation. Initial cell dimensions and orientation matrices were determined and the frames used to evaluate the quality of the crystals. A full sphere of intensity data were collected with the CCD set to the appropriate maximum 2**°). The Bruker routine SAINT was used to integrate the frames and produce a set of intensities, which were corrected for absorption effects using SADABS. All subsequent computations were performed using the NRCVAX[[3]](#endnote-4)1 suite of programs using scattering factors taken from reference 12b. The structures were solved using direct methods to locate the non-hydrogen atoms.

**Synthesis of [(pyridine-2,6-(2,6-*i*Pr2Ph)NCCH3)Rh][B(Ar’)4] (1).** Inside the drybox, 100 mg (0.161 mmol, 1 eq.) of **5** and 150 mg (0.169 mmol, 1.05 eq.) of NaB(Ar’)4 were weighed into a Schlenk flask, which was capped with a rubber septum and placed on a Schlenk line under argon. CH2Cl2 (5 ml) was added *via* syringe and the reaction was stirred for 2 hours at room temperature, during which time the solution changed color from dark green to dark orange. The supernatant was transferred to a separate flask *via* cannula filtration, and the remaining residue was washed with dichloromethane. The filtrate was evaporated to dryness *in vacuo*, and dried overnight at room temperature. 1H NMR(CD2Cl2, all peaks are broad):  8.24 (t, 3*J*HH=8 Hz, 1H, pyridine *H*para), 7.73 (br m, , 10H, B(Ar’)4 *H*ortho and pyridine *H*meta), 7.56 (br s, 4H, B(Ar’)4 *H*para), 7.37 (AA’B dd, 2H, 2,6-(C3H7)2-Ph-*H*para), 7.30 (AA’B d, 4H, 2,6-(C3H7)2-Ph-*H*meta), 3.12 (sept, 3*J*HH=7 Hz, 4H, ArC*H*(CH3)2), 2.02 (s, 6H, N=CC*H*3), 1.20 (d, 3*J*HH=7 Hz, 12H, ArCH(C*H*3)2), 1.18 (d, 3*J*HH=7 Hz, 12H, ArCH(C*H*3)2). 13C NMR:  171.9, 162.0 (q, 1*J*BC=50 Hz, B(Ar’)4), 155.9, 143.9, 140.0, 135.1 (s, B(Ar’)4), 133.7, 129.1 (qm, 2*J*CF=32 Hz, B(Ar’)4), 129.0, 125.8, 125.3, 124.9 (q, 1*J*CF=272 Hz, B(Ar’)4), 117.8 (m, B(Ar’)4), 28.9, 23.7, 23.6, 17.6.

Due to the extreme sensitivity of **1** to water, accurate elemental analysis could not be obtained. Instead, the 1H NMR spectrum of **1** is provided in Figure S2.

**Synthesis of [(pyridine-2,6-(2,6-*i*Pr2Ph)NCCH3)Rh(CH3)(I)][B(Ar’)4] (3).** Inside the drybox, 200 mg (0.323 mmol, 1 eq.) of **5** and 286 mg (0.323 mmol, 1 eq.) of NaB(Ar’)4 were weighed into a Schlenk flask, which was capped with a rubber septum and placed on a Schlenk line under argon. CH2Cl2 (15 ml) was added *via* syringe and the reaction was stirred for 1 hour at room temperature, during which time the solution changed color from dark green to dark orange. The supernatant was transferred to a separate flask *via* cannula filtration, and the remaining NaCl residue was washed with dichloromethane. 40 l (92 mg, 0.646 mmol, 2 eq.) of methyl iodide were added to the filtrate and the reaction was stirred for an additional 20 minutes, during which time the solution color became a very dark reddish/pink. The solution was evaporated to dryness *in vacuo*, and 480 mg of the product **4** were isolated as a brittle foam and used without further purification (93% yield). If necessary, the product can be recrystallized from CH2Cl2/pentane. 1H NMR(CD2Cl2):  8.43 (AA’B t, 1H, pyridine *H*para), 8.12 (AA’B d, 2H, pyridine *H*meta), 7.73 (br m, , 8H, B(Ar’)4 *H*ortho), 7.56 (br s, 4H, B(Ar’)4 *H*para), 7.24-7.42 (m, 6H, 2,6-(C3H7)2-C6*H*3), 2.43 (s, 6H, N=CC*H*3), 2.37 (sept, 3*J*HH=7 Hz, 4H, ArC*H*(CH3)2), 2.16 (d, 2*J*RhH=3 Hz, 3H, Rh-C*H*3), 1.27 (d, 3*J*HH=7 Hz, 6H, ArCH(C*H*3)2), 1.24 (d, 3*J*HH=7 Hz, 6H, ArCH(C*H*3)2), 1.19 (d, 3*J*HH=7 Hz, 6H, ArCH(C*H*3)2), 1.02 (d, 3*J*HH=7 Hz, 6H, ArCH(C*H*3)2). 13C{1H} NMR:  182.3, 162.0 (q, 1*J*BC=50 Hz, B(Ar’)4), 156.7, 143.3, 140.1, 139.2, 139.0, 135.1 (s, B(Ar’)4), 129.8, 129.6, 129.1 (qm, 2*J*CF=32 Hz, B(Ar’)4), 124.9 (q, 1*J*CF=272 Hz, B(Ar’)4), 124.9, 124.7, 117.8 (m, B(Ar’)4), 32.1, 29.2, 24.9, 24.7, 23.7, 22.8, 20.3, 8.9 (d, 1*J*RhC=25 Hz, Rh-*C*H3). Anal. calc. C, 49.86; H, 3.68; N, 2.64. Found C, 49.87; H, 3.68; N, 2.55.

**Synthesis of [(pyridine-2,6-(2,6-*i*Pr2Ph)NCCH3)Rh(**1-*p*-tolualdehyde)][B(Ar’)4] (4a).** Complex **1** was prepared *in situ* as described above from 50 mg (0.081 mmol, 1 eq.) of **5** and 72 mg (0.081 mmol, 1 eq.) of NaB(Ar’)4. After filtration to remove NaCl, *p*-tolualdehyde (10 l, 0.081 mmol, 1 eq.) was added *via* syringe. Upon addition, the solution changes color from dark orange to dark green/brown. The reaction was stirred for an additional 10 minutes, and the solvent was removed *in vacuo*, yielding 120 mg (0.077 mmol, 95% yield) of a dark green solid which was isolated and stored inside of a dry box. 1H NMR(CD2Cl2):  8.29 (t, 3*J*HH=8 Hz, 1H, pyridine *H*para), 7.73 (br m, 10H, B(Ar’)4 *H*ortho and pyridine *H*meta), 7.56 (br s, 4H, B(Ar’)4 *H*para), 7.45 (s, 1H, *H*C(O)C7H7), 7.41 (AA’B dd, 2H, 2,6-(C3H7)2-Ph-*H*para), 7.29 (AA’B d, 4H, 2,6-(C3H7)2-Ph-*H*meta), 7.13 (d, 3*J*HH=8 Hz, 2H, HC(O)-*p*-tolyl-*H*meta), 6.68 (d, 3*J*HH=8 Hz, 2H, HC(O)-*p*-tolyl-*H*ortho), 3.18 (sept, 3*J*HH=7 Hz, 4H, ArC*H*(CH3)2), 2.36 (s, 3H, HC(O)-*p*-C6H4-C*H*3), 2.04 (s, 6H, N=CC*H*3), 1.19 (d, 3*J*HH=7 Hz, 12H, ArCH(C*H*3)2), 0.94 (d, 3*J*HH=7 Hz, 12H, ArCH(C*H*3)2). 13C{1H} NMR:  201.3 (H*C*(O)-p-tolyl), 170.2, 162.0 (q, 1*J*BC=50 Hz, B(Ar’)4), 157.1, 150.3, 143.6, 140.7, 135.1 (s, B(Ar’)4), 132.2, 131.7, 131.2, 130.4, 129.1 (qm, 2*J*CF=32 Hz, B(Ar’)4), 128.0, 125.3, 124.9 (q, 1*J*CF=272 Hz, B(Ar’)4), 124.7, 117.8 (m, B(Ar’)4), 28.8, 23.6, 23.5, 22.3, 17.6.

**Synthesis of [(pyridine-2,6-(2,6-*i*Pr2Ph)NCCH3)Rh(**1-acetophenone)][B(Ar’)4] (4b).** Synthesized according to the exact procedure for **6a** employing acetophenone (9.4 l). Spectroscopic data omitted due to multiple species in solution.

**Hydrosilation of benzaldehyde and acetophenone.** Inside the dry box, **2** (5 mg, 0.008 mmol) and NaB(Ar’)4 (7.5 mg, 0.008 mmol) were weighed into an NMR tube to which chlorobenzene-*d*5 (0.5 ml) was added. After 15 minutes, benzaldehyde (37.3 l, 38.4 mg, 0.32 mmol) was added *via* syringe, followed by triethylsilane (51.1 l, 37.2 mg, 0.32 mmol), and the reaction was heated to 70°C in an oil bath. After 2 hours, the reaction had reached 95% conversion to the triethylsilyl ether as determined by integration of the aldehydic proton resonance and the corresponding methine proton resonance in the silyl enol ether product **5a** in the 1H NMR spectrum. Because no other products are formed from the aldehyde, an internal standard did not need to be used.

The same procedure was followed employing acetophenone (37.3 l, 38.4 mg, 0.32 mmol). After heating for 17 hrs. at 70°C in chlorobenzene-*d*5, the reaction had reached 90% conversion to the silyl ether as determined by integration of the acetophenone methyl resonance and the corresponding methyl resonance in the silyl ether product **5b** in the 1H NMR spectrum.

**Aldol condensations of benzaldehyde and acetophenone.** Inside the dry box, **2** (5 mg, 0.008 mmol) and NaB(Ar’)4 (7.5 mg, 0.008 mmol) were weighed into an NMR tube to which chlorobenzene-*d*5 (0.5 ml) was added. After 15 minutes, benzaldehyde (37.3 l, 38.4 mg, 0.32 mmol) was added *via* syringe, followed by 1-trimethylsilyloxy-1-phenyl ethylene (65.6 l, 61.5 mg, 0.32 mmol), and the reaction was placed heated to 65°C in an oil bath. After 24 hours, the reaction had reached 88% conversion as determined by integration of the aldehydic proton resonance and the corresponding methine proton resonance in the aldol product **6a** in the 1H NMR spectrum. Because no other products are formed from the aldehyde, an internal standard did not need to be used. The experiment was also performed in CD2Cl2, and after 24 hours at room temperature had reached only 50% conversion.

**Cyclopropanation of 1-octene.** Inside the dry box, **2** (25 mg, 0.04 mmol) and NaB(Ar’)4 (38 mg, 0.04 mmol) were weighed into a 10 ml round bottom flask which was capped with a rubber septum and connected to a Schlenk line. CH2Cl2 (5 ml) was added *via* syringe, and the reaction was stirred for 1 hour at room temperature. 1-octene (250 l, 168 mg, 2 mmol) was added *via* syringe, followed by ethyl diazoacetate (210 l, 228 mg, 2 mmol). The reaction was stirred overnight, and the solution concentrated by rotary evaporation. After chromatography on silica gel (7% ethyl acetate/hexanes), 325 mg (95% yield) of the combined products **7b**, **8b**, and **9b** were recovered. The product distribution, determined by 1H NMR spectroscopy (CDCl3) by comparison with spectra of structurally similar compounds,[[4]](#endnote-5) was 85% **7b**, 9% **8b**, and 6% **9b**.

Monitoring the the cyclopropanation of 1-hexene and ethyl diazoacetate in CD2Cl2 reveals a similar product distribution for **7a**, **8a**, and **9a**, however the volatility of the products made the determination of both yield and isolated product distribution unfeasible.

1. **Notes and References**

   ? Pangborn, A. B.; Giardello, M. A.; Grubbs, R. H.; Rosen, R. K.; Timmers, F. J. *Organometallics* **1996**, *15*, 1518-1520. [↑](#endnote-ref-2)
2. Haarmann, H. F.; Ernsting, J. M.; Kranenburg, M.; Kooijman, H.; Veldman, N. *et. al. Organometallics* **1997**, *16*, 887-900. [↑](#endnote-ref-3)
3. (a) Gabe, E. J.; Le Page, Y.; Charland, J.-P.; Lee, F. L.; White, P. S. *J. Appl. Crystallog.* **1989**, *22*, 384-387. (b) *International Tables for X-ray Crystallography*; The Kynoch Press: Birmingham, England, **1974**, Vol. IV. [↑](#endnote-ref-4)
4. *The Aldrich Library of 13C and 1H FTNMR Spectra*; Pouchert, C. J., Behnke, J., Eds.; Aldrich Chemical Company, Inc.: Milwaukee, WI, 1993. [↑](#endnote-ref-5)
